# Supplementary material for: Lipid bilayer-mediated spatiotemporal correlation between near-wall confined motion of micro-carriers
Source: Royal Society of Chemistry journal article supplement (doi:10.1039/d5sm01211b), 2025-12-18

Supporting Information for

**Lipid bilayer-mediated spatiotemporal correlation between near-wall confined motion of micro-carriers**

Wei Liu,<sup>a</sup> Jinwei Zhong,<sup>a</sup> Pui Wo Felix Yeung,<sup>b</sup> Xiahui Xiao,<sup>a</sup> Yuwei Zhu<sup>\*a</sup> and To Ngai<sup>\*b</sup>

<sup>a</sup>The Key Laboratory of Synthetic and Biological Colloids, Ministry of Education & School of Chemical and Material Engineering, Jiangnan University, Wuxi 214122, PR China

<sup>b</sup>Department of Chemistry, The Chinese University of Hong Kong, Shatin, N.T., Hong Kong 999077, PR China

<sup>\*</sup>Corresponding author: uvyzhu@gmail.com (Y. Z.); tongai@cuhk.edu.hk (T. N.)

**Supplementary Figure S1:** Trajectory of the z-directional displacements of particles 1–7 (P1–7) at different points in time. Arrows indicate where the mean square displacements are calculated in Fig. S4.

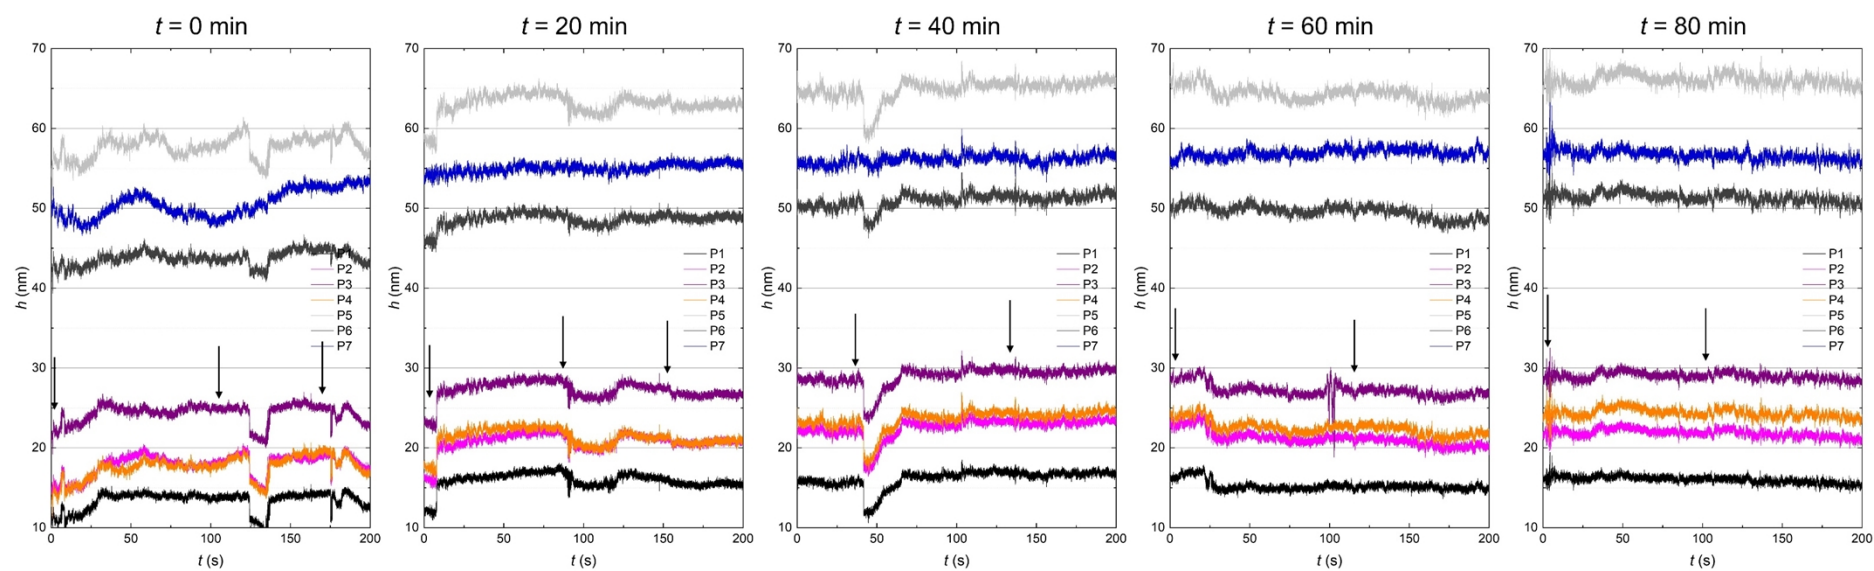

**Supplementary Figure S2:** Intensity trajectories for bare particles 1–6 on surface of bare glass (a), bare particles 7–11 on supported lipid bilayers (SLBs) (b), lipid bilayer-modified particles 12–15 (CSLBs) on surface of bare glass (c), and height profiles for CSLBs 16–18 on SLBs at various time (d).

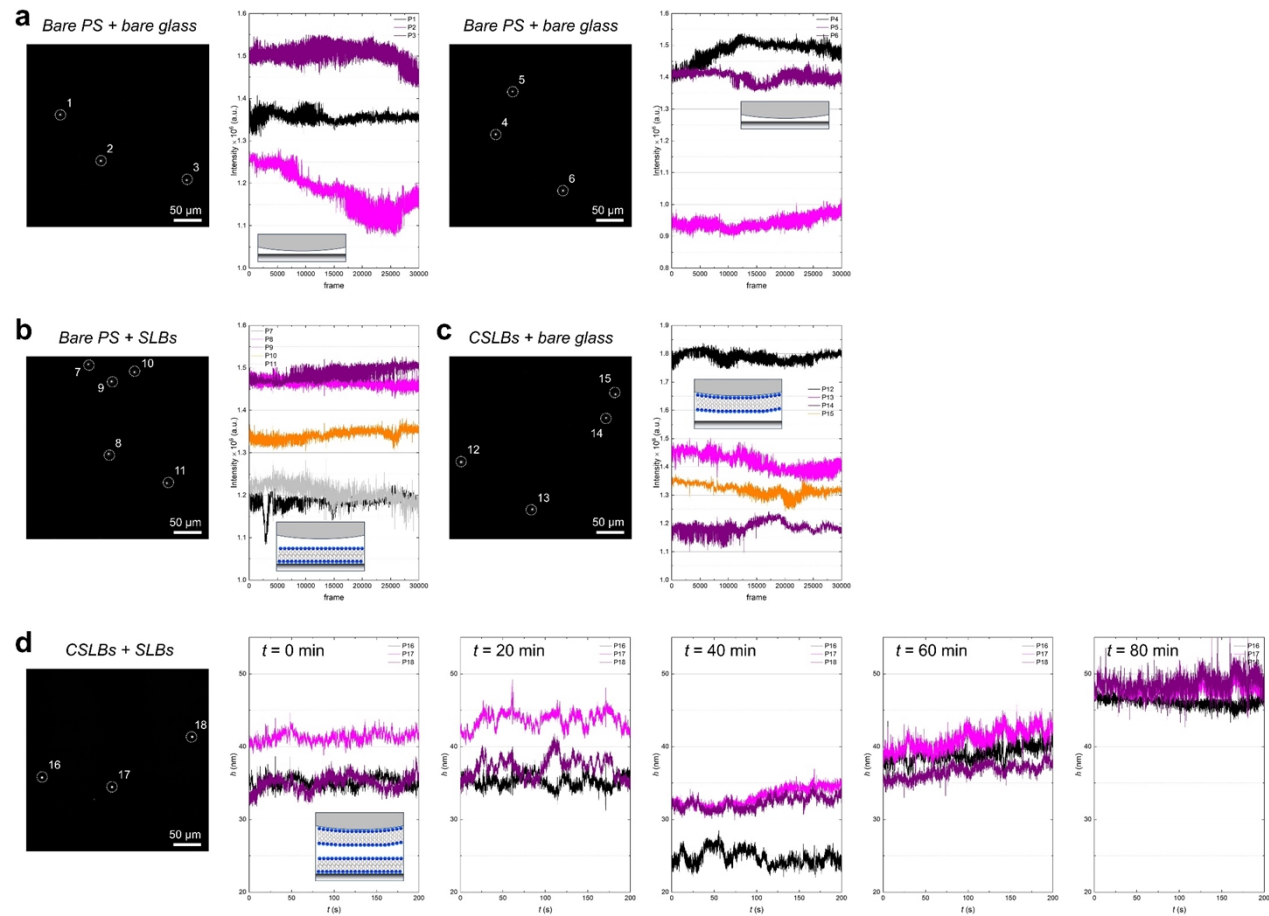

**Supplementary Figure S3:** Normalized cross-correlation functions (CCF) at various time using signals of P1 to P7 (from top to bottom) as the reference, respectively.  $t < 0$  represents the negative lag time.

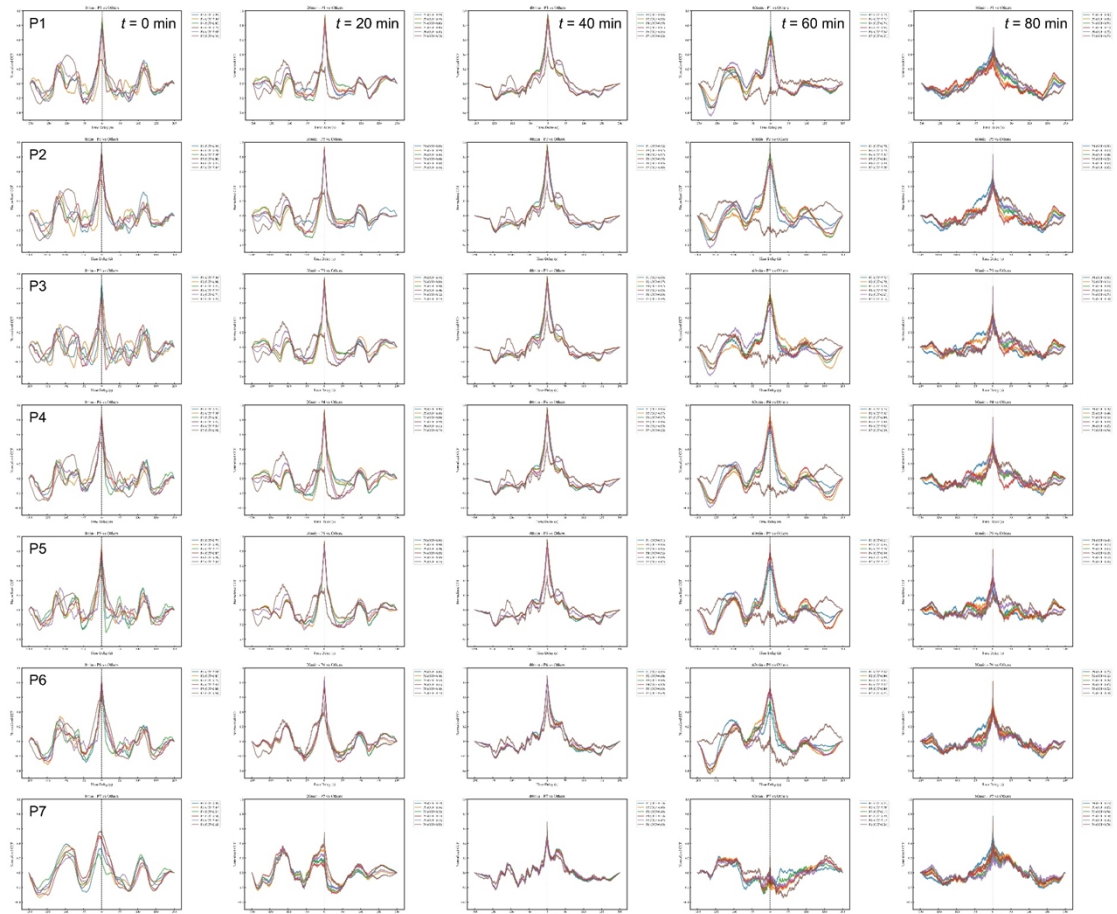

**Supplementary Figure S4:** Mean squared displacements of microspheres of interest at various time. Solid lines represent the non-linear fitting for corralled diffusion with a relaxed power-law exponent.

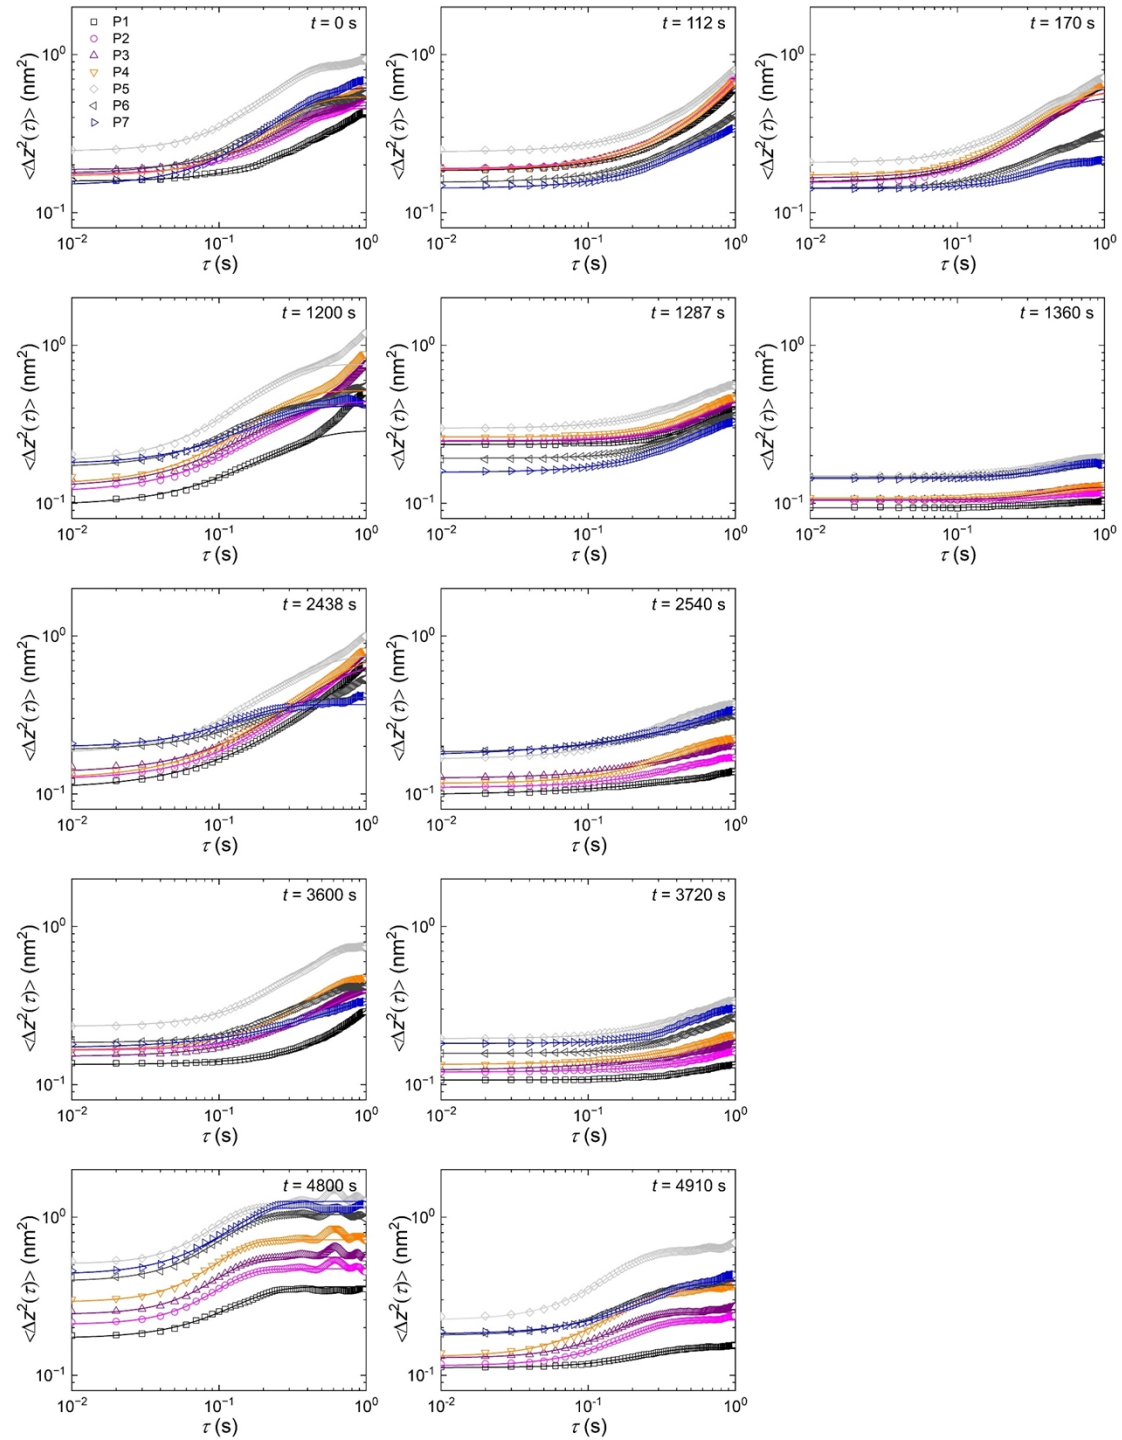

**Supplementary Figure S5:** Time-evolutions of the anomalous diffusion exponent  $\alpha$  (a) and corral size  $z_c$  (b) for the seven microspheres. (c) Log-log plot of  $z_c$  versus diffusion constant  $D_z$ . The dotted circle highlights the region of crowded distribution.

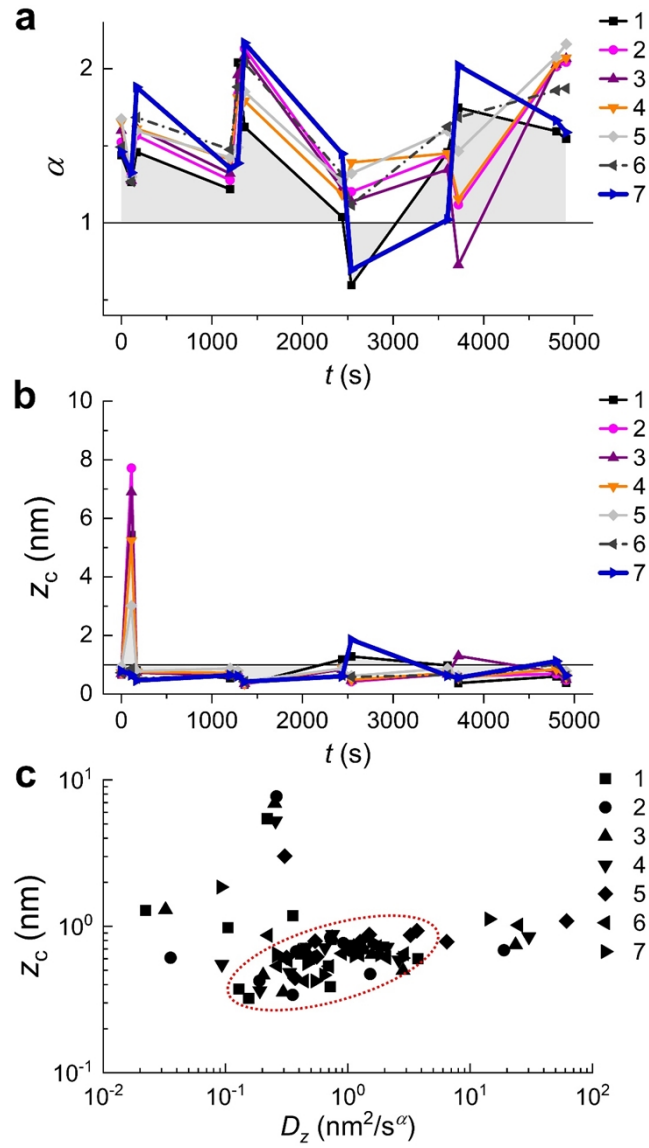

Supplement: d5sm01211b1.pdf [file d5sm01211b1.pdf]
